# Supplementary material
Source: HighWire-hosted journal article supplement (https://cmajopen.ca/content/suppl/2018/01/04/6.1.E1)
Supplement: 2017-0144-1-at.pdf [file 2017-0144-1-at.pdf]

## Appendix 1 (as supplied by the authors): Supplementary data

### I. Cancer prevalence in Canada

We obtained 10-year person-based cancer prevalence rates for all of Canada for some years of our study period from data published by Statistics Canada in conjunction with the Canadian Cancer Society. Data on cancer prevalence broken down by province and territory were not available. However, 10-year person-based prevalence rates by sex were available for 2005, 2007 and 2009 only.<sup>1-3</sup> Based on the available data, we used linear interpolation to extrapolate prevalence rates by sex for the remaining years (2006, 2008, and 2010-2012).

The Canadian Cancer Statistics 2014 publication included tumour-based 10-year prevalence by sex and age group (ages 0-19, 20-29, 30-39, 40-49, 50-59, 60-69, 70-79, and 80+) (Table 6.2).<sup>3</sup> These data show that tumour prevalence rises with age, peaking for those 60-79 years of age. Mariotto and colleagues show that the likelihood of having more than one primary tumour rises with age.<sup>4</sup> Hence, rather than apply the sex and age distribution of tumour-based prevalence directly to person-based prevalence, we redistributed the sex and age weights to reflect the likelihood of finding fewer tumours per person among younger people and more tumours per person among older people. We then calculated the numbers of people living with cancer as of January 1<sup>st</sup>, 2009, by multiplying the sex/age group weights by the total number of males and females in each age group in the population. Finally, we divided the total population by the estimated numbers of people with cancer as of January 1<sup>st</sup>, 2009, in each sex/age group, to obtain the prevalence expressed as “1 in n” members of the Canadian population. We extrapolated the sex and age group distributed prevalence estimates from 2009 to all other years in our study based on the overall total prevalence estimates by sex for each year (described above).

To estimate the number of people living with cancer, we assumed the same prevalence rate in each province/territory (the prevalence rate for Canada) and multiplied our sex and age group prevalence estimates by the population (broken down by the corresponding sex and age groups) of each province/territory obtained from NHES data (Appendix tables C.11 to C.18).<sup>5</sup> For comparability with the EBIC report, we redistributed the total prevalence estimates from the Canadian Cancer Statistics 2014 groupings (provided above) to those used in the EBIC report (ages 0-14, 15-34, 35-54, 55-64, 65-74, and 75+) assuming equal allocations across age groups. For example, half of those ages 70-79 were allocated to the 65-74 year old group and half to the 75 and older group.

Table 2 includes estimates of cancer prevalence in Canada by sex for each year of our analysis. Our results suggest that prevalence in Canada has been increasing over time for both sexes, from 663,827 in 2005 to 958,632 in 2012 (an increase of 44.4% or 5.6% per annum). Between 2005 and 2007, we estimate that there were slightly more females than males with cancer in Canada; from 2008 onward the trend reverses (Figure 1). Prevalence increased in a linear fashion with age across the study period. The number of children (0-14) and young people (15-34) with cancer was low and rose slowly over the period. The number of patients with cancer between the ages of 35 and 54 was higher but remained relatively flat over the time period. By contrast, prevalence increased steadily from 2005 to 2012 among older patients (ages 55-64, 65-74 and 75 and older).

**Supplementary Table S1 – Estimated 10-year cancer prevalence\* by year (2005-2008 and 2009-2012), age and sex, for Canada**

|                   | 2005    | 2006    | 2007    | 2008    | 2009    | 2010    | 2011    | 2012    |
|-------------------|---------|---------|---------|---------|---------|---------|---------|---------|
| <b>Both Sexes</b> |         |         |         |         |         |         |         |         |
| 0-14              | 4,917   | 5,065   | 5,235   | 5,373   | 5,516   | 5,659   | 5,810   | 5,972   |
| 15-34             | 21,474  | 22,172  | 23,039  | 23,707  | 24,476  | 25,304  | 26,115  | 27,162  |
| 35-54             | 128,510 | 134,437 | 140,006 | 143,795 | 147,877 | 152,117 | 156,457 | 161,027 |
| 55-64             | 135,868 | 145,395 | 156,809 | 166,814 | 177,177 | 188,269 | 199,681 | 211,507 |
| 65-74             | 169,779 | 179,373 | 191,518 | 202,451 | 214,193 | 226,805 | 240,538 | 255,661 |
| 75+               | 203,278 | 214,122 | 226,584 | 237,943 | 250,283 | 264,151 | 279,562 | 297,303 |
| Total             | 663,827 | 700,565 | 743,192 | 780,083 | 819,522 | 862,304 | 908,163 | 958,632 |
| <b>Female</b>     |         |         |         |         |         |         |         |         |
| 0-14              | 2,209   | 2,276   | 2,355   | 2,388   | 2,419   | 2,446   | 2,472   | 2,498   |
| 15-34             | 12,471  | 12,877  | 13,398  | 13,669  | 13,982  | 14,317  | 14,623  | 15,022  |
| 35-54             | 83,926  | 87,694  | 91,199  | 92,746  | 94,390  | 96,043  | 97,653  | 99,338  |
| 55-64             | 72,127  | 77,123  | 82,921  | 86,994  | 91,091  | 95,325  | 99,493  | 103,735 |
| 65-74             | 74,324  | 78,397  | 83,720  | 87,315  | 91,039  | 94,887  | 98,885  | 103,202 |
| 75+               | 91,960  | 96,446  | 101,692 | 104,931 | 108,359 | 112,165 | 116,167 | 120,608 |
| Total             | 337,017 | 354,814 | 375,285 | 388,044 | 401,280 | 415,182 | 429,294 | 444,404 |
| <b>Male</b>       |         |         |         |         |         |         |         |         |
| 0-14              | 2,708   | 2,789   | 2,879   | 2,984   | 3,097   | 3,213   | 3,338   | 3,474   |
| 15-34             | 9,004   | 9,295   | 9,640   | 10,038  | 10,495  | 10,986  | 11,492  | 12,140  |
| 35-54             | 44,584  | 46,743  | 48,807  | 51,049  | 53,486  | 56,074  | 58,803  | 61,689  |
| 55-64             | 63,741  | 68,272  | 73,889  | 79,820  | 86,086  | 92,944  | 100,189 | 107,772 |
| 65-74             | 95,455  | 100,976 | 107,799 | 115,136 | 123,154 | 131,918 | 141,653 | 152,458 |
| 75+               | 111,318 | 117,676 | 124,892 | 133,012 | 141,924 | 151,986 | 163,395 | 176,695 |
| Total             | 326,809 | 345,751 | 367,906 | 392,039 | 418,241 | 447,122 | 478,869 | 514,228 |

**Source:** 10-year cancer prevalence was estimated using a combination of published 10-year prevalence figures for Canada as a whole for selected years (2005, 2007 and 2009) from the Canadian Cancer Society (CCS) and Statistics Canada<sup>1-3</sup> and National Health Expenditure data on population by age, sex and province/territory for 2005–2012.<sup>5</sup>

Supplementary Figure S1 – Estimated 10-year cancer prevalence by sex and year (2005-2008 and 2009-2012), Canada

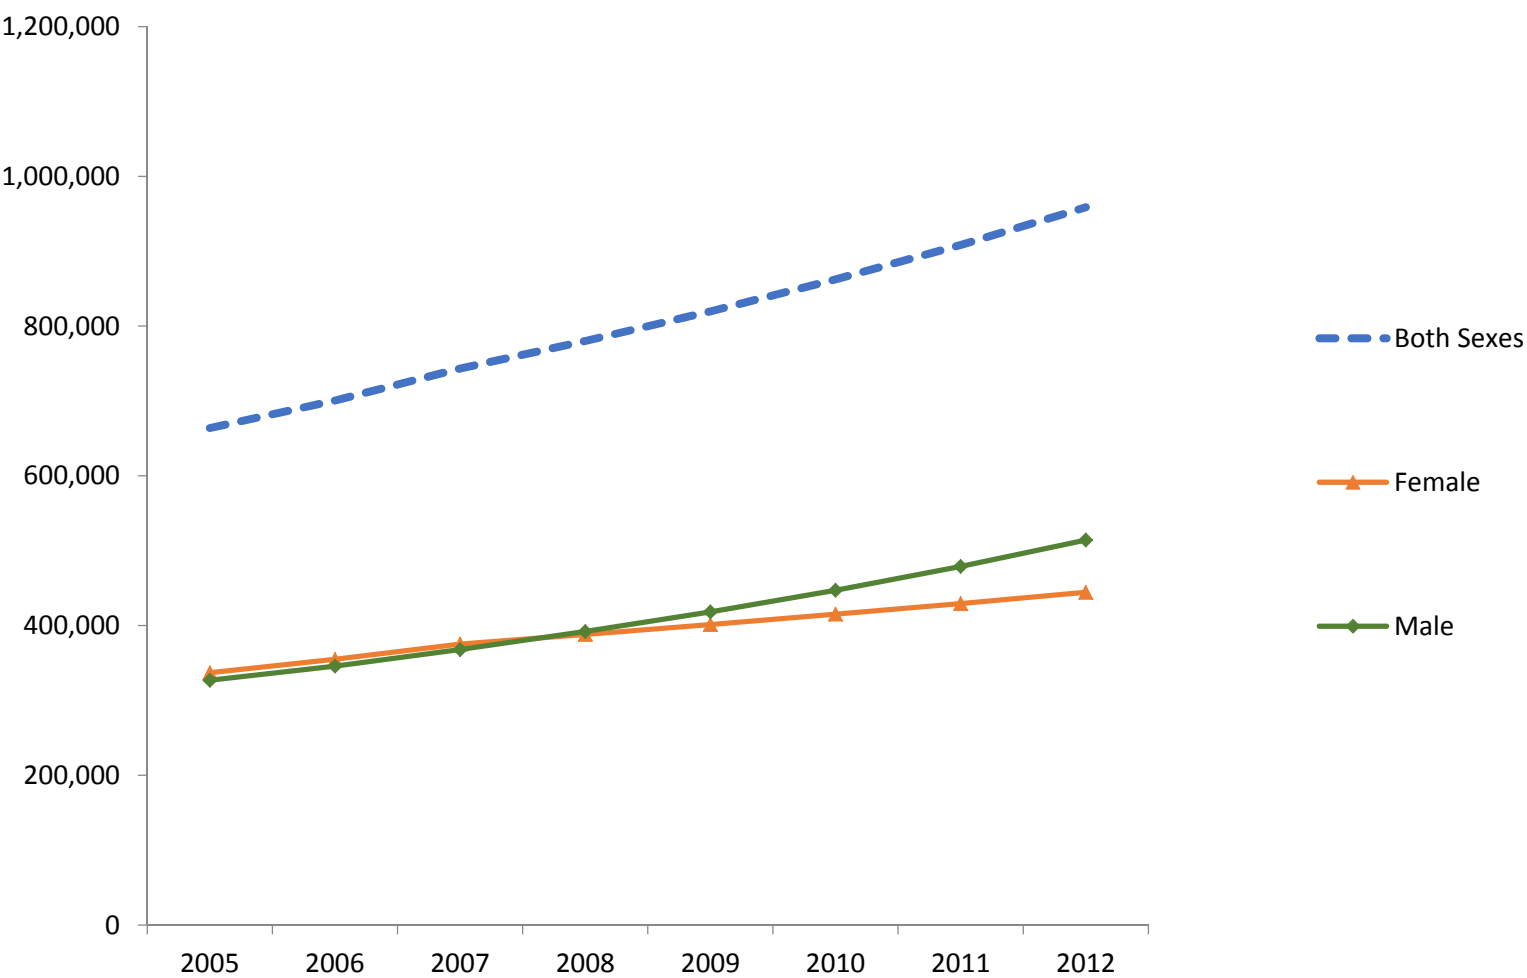

**Source:** 10-year cancer prevalence was estimated using a combination of published 10-year prevalence figures for Canada as a whole for selected years (2005, 2007 and 2009) from the Canadian Cancer Society (CCS) and Statistics Canada<sup>1-3</sup> and National Health Expenditure data on population by age, sex and province/territory for 2005–2012.<sup>5</sup>

**Supplementary Table S2 - Neoplasm codes**

| <b>EBIC CODE</b> | <b>EBIC DIAGNOSTIC CATEGORIES</b>  | <b>ICD-9 CODE</b>                                                                             | <b>ICD-10 CODE</b>                                                                                                              |
|------------------|------------------------------------|-----------------------------------------------------------------------------------------------|---------------------------------------------------------------------------------------------------------------------------------|
| <b>E06</b>       | <b>Malignant Neoplasms</b>         | <b>140-208, 238.6</b>                                                                         | <b>C00-C97</b>                                                                                                                  |
| E06.1            | Oral Cancers                       | 140-149                                                                                       | C00-C14                                                                                                                         |
| E06.2            | Esophagus Cancer                   | 150                                                                                           | C15                                                                                                                             |
| E06.3            | Stomach Cancer                     | 151                                                                                           | C16                                                                                                                             |
| E06.4            | Colorectal Cancer                  | 153,154,159.0                                                                                 | C18-C21,C26.0                                                                                                                   |
| E06.5            | Liver Cancer                       | 155 (minus 155.1,155.2)                                                                       | C22.0,C22.2-C22.7                                                                                                               |
| E06.6            | Pancreas Cancer                    | 157                                                                                           | C25                                                                                                                             |
| E06.7            | Larynx Cancer                      | 161                                                                                           | C32                                                                                                                             |
| E06.8            | Trachea Cancer                     | 162.0                                                                                         | C33                                                                                                                             |
| E06.9            | Bronchus and Lung Cancers          | 162.2-162.9                                                                                   | C34                                                                                                                             |
| E06.10           | Melanoma                           | 172                                                                                           | C43                                                                                                                             |
| E06.11           | Other Skin Cancers                 | 173                                                                                           | C44                                                                                                                             |
| E06.12           | Breast Cancer                      | 174,175                                                                                       | C50                                                                                                                             |
| E06.13           | Cervix Cancer                      | 180                                                                                           | C53                                                                                                                             |
| E06.14           | Body of Uterus Cancer              | 179,182                                                                                       | C54-C55                                                                                                                         |
| E06.15           | Ovary Cancer                       | 183                                                                                           | C56                                                                                                                             |
| E06.16           | Prostate Cancer                    | 185                                                                                           | C61                                                                                                                             |
| E06.17           | Testis Cancer                      | 186                                                                                           | C62                                                                                                                             |
| E06.18           | Bladder Cancer (including in situ) | 188                                                                                           | C67                                                                                                                             |
| E06.19           | Kidney Cancer                      | 189.0,189.1                                                                                   | C64-C65                                                                                                                         |
| E06.20           | Brain Cancer                       | 191,192                                                                                       | C70-C72                                                                                                                         |
| E06.21           | Thyroid Cancer                     | 193                                                                                           | C73                                                                                                                             |
| E06.22           | Hodgkin Lymphoma                   | 201                                                                                           | C81                                                                                                                             |
| E06.23           | Non-Hodgkin Lymphoma               | 200,202 (minus 202.4)                                                                         | C82-C85,C96.3                                                                                                                   |
| E06.24           | Multiple Myeloma                   | 203.0                                                                                         | C90.0,C90.2                                                                                                                     |
| E06.25           | Leukemia                           | 202.4,203.1,204-208                                                                           | C90.1,C91-C95                                                                                                                   |
| E06.26           | Other Malignant Neoplasms          | 152, 155.1, 155.2, 156, 158-160, 163-171, 176, 81, 184, 187, 189.2-190, 194-199, 203.8, 238.6 | C17, C22.1, C22.9, C23, C24, C26-C31, C37-C41, C45-C49, C51, C52, C57-C60, C63, C66, C68-C69, C74-C80, C86, C88, C90.3,C96, C97 |

**Legend:**

EBIC – Economic Burden of Illness in Canada

ICD – International Classification of Diseases

## II. Cost extrapolation to other provinces/territories and Canada

Data from the NHEX were used to create extrapolation factors to reflect differences between Ontario and each province/territory,  $j$ , in terms of relative expenditures by category  $k$  (where  $k$  = hospital care, physician care and provincial/territorial government-funded outpatient prescription drugs). This calculation consisted of three steps:

- (1) Estimate the mean net cost of category  $k$ , for each sex/age group in a given province,  $j$ , by multiplying the estimate of the mean net cost of category  $k$  for patients in that sex/age group in Ontario by the ratio of total expenditures in category  $k$  for each sex/age group in province  $j$  to total expenditures in category  $k$  by sex/age group in Ontario, as follows

Estimated  
using ICES  
data

Estimated using  
NHEX data

$$NC_k^j = NC_k^{ON} * \left( \frac{CPP_{TOTk}^j}{CPP_{TOTk}^{ON}} \right),$$

where  $NC_k^j$  is the mean net cost of category  $k$  in a given sex/age group and province  $j$ ,  $NC_k^{ON}$  is the mean net cost of category  $k$  per patient in a given sex/age group in Ontario,  $CPP_{TOTk}^j$  is the mean cost per person of total expenditures in category  $k$  for that sex/age group in province  $j$ , and  $CPP_{TOTk}^{ON}$  is the mean cost per patient of total expenditures in category  $k$  for that sex/age group in Ontario.

- (2) Estimate total net cost of category  $k$  for cancer patients in province  $j$  by multiplying the mean net estimated cost of category  $k$  for cancer in each sex/age group by the estimated number of patients diagnosed with cancer in the past 10 years in that sex/age group and then sum over the totals for each sex/age group to obtain the total net cost of category  $k$  for cancer patients in province  $j$  as follows

$$TC_k^j = \sum_i (NC * POP)_i,$$

where  $TC_k^j$  is the total net cost of category  $k$  for cancer patients in province  $j$  over all sex/age groups,  $NC$  is the mean net cost of category  $k$  for cancer per patient in a given sex/age group in province  $j$ ,  $POP$  is the total number of patients diagnosed with cancer in the prior 10 years in a given sex/age group in province  $j$ , and  $i$  denotes a member in the set of sex/age groups.

- (3) Estimate the total net cost of category  $k$  for cancer patients across Canada by summing total net cost estimates of category  $k$  across each province/territory  $j$ .

### III. Quality of control match

Supplementary Table S3 – Details of case-control match, 2005

| Variable   |              | 2005 Alive Cohort    |                         |                                           | 2005 Death Cohort    |                         |                                           |
|------------|--------------|----------------------|-------------------------|-------------------------------------------|----------------------|-------------------------|-------------------------------------------|
|            |              | Cases<br>(N=470,620) | Controls<br>(N=470,620) | Standardized<br>Difference in<br>the Mean | Cases<br>(N=114,354) | Controls<br>(N=114,354) | Standardized<br>Difference in<br>the Mean |
| Age, years | Mean ± SD    | 62.47 ± 15.37        | 62.15 ± 15.41           | 0.02                                      | 74.40 ± 12.83        | 74.70 ± 13.16           | 0.02                                      |
|            | Median (IQR) | 64 (53-74)           | 64 (52-74)              | 0.02                                      | 77 (67-83)           | 76 (68-84)              | 0.02                                      |
| CADG 1     | Number (%)   | 267,655 (56.9%)      | 267,655 (56.9%)         | 0                                         | 45,409 (39.7%)       | 45,409 (39.7%)          | 0                                         |
| CADG 2     | Number (%)   | 330,598 (70.2%)      | 330,598 (70.2%)         | 0                                         | 57,745 (50.5%)       | 57,745 (50.5%)          | 0                                         |
| CADG 3     | Number (%)   | 219,650 (46.7%)      | 219,650 (46.7%)         | 0                                         | 29,863 (26.1%)       | 29,863 (26.1%)          | 0                                         |
| CADG 4     | Number (%)   | 9,117 (1.9%)         | 9,117 (1.9%)            | 0                                         | 533 (0.5%)           | 533 (0.5%)              | 0                                         |
| CADG 5     | Number (%)   | 130,854 (27.8%)      | 130,854 (27.8%)         | 0                                         | 35,000 (30.6%)       | 35,000 (30.6%)          | 0                                         |
| CADG 6     | Number (%)   | 205,013 (43.6%)      | 205,013 (43.6%)         | 0                                         | 29,685 (26.0%)       | 29,685 (26.0%)          | 0                                         |
| CADG 7     | Number (%)   | 17,457 (3.7%)        | 17,457 (3.7%)           | 0                                         | 850 (0.7%)           | 850 (0.7%)              | 0                                         |
| CADG 8     | Number (%)   | 74,047 (15.7%)       | 74,047 (15.7%)          | 0                                         | 8,292 (7.3%)         | 8,292 (7.3%)            | 0                                         |
| CADG 9     | Number (%)   | 20,604 (4.4%)        | 20,604 (4.4%)           | 0                                         | 1,483 (1.3%)         | 1,483 (1.3%)            | 0                                         |
| CADG 10    | Number (%)   | 45,174 (9.6%)        | 45,174 (9.6%)           | 0                                         | 11,399 (10.0%)       | 11,399 (10.0%)          | 0                                         |
| CADG 11    | Number (%)   | 249,970 (53.1%)      | 249,970 (53.1%)         | 0                                         | 30,446 (26.6%)       | 30,446 (26.6%)          | 0                                         |
| CADG 12    | Number (%)   | 5,020 (1.1%)         | 5,020 (1.1%)            | 0                                         | 28 (0.0%)            | 28 (0.0%)               | 0                                         |

**Legend:** SD – standard deviation; IQR – interquartile range; CADG – Collapsed Adjusted Diagnosis Groups

**Note:** The cohort was matched on age+/-2 years, sex (hard match, not shown) and CADG from the Johns Hopkins Adjusted Clinical Groups (ACG) software.

**Source:** Data housed at Institute for Clinical Evaluative Sciences.

**Supplementary Table S4 – Details of case-control match, 2009**

| Variable          |              | 2009 Alive Cohort    |                         |                                           | 2009 Death Cohort    |                         |                                           |
|-------------------|--------------|----------------------|-------------------------|-------------------------------------------|----------------------|-------------------------|-------------------------------------------|
|                   |              | Cases<br>(N=556,349) | Controls<br>(N=556,349) | Standardized<br>Difference in<br>the Mean | Cases<br>(N=121,977) | Controls<br>(N=121,977) | Standardized<br>Difference in<br>the Mean |
| <b>Age, years</b> | Mean ± SD    | 63.01 ± 15.28        | 62.69 ± 15.27           | 0.02                                      | 75.29 ± 12.88        | 75.58 ± 13.22           | 0.02                                      |
|                   | Median (IQR) | 64 (54-74)           | 64 (53-74)              | 0.02                                      | 78 (68-85)           | 78 (68-85)              | 0.02                                      |
| <b>CADG 1</b>     | Number (%)   | 313,355 (56.3%)      | 313,355 (56.3%)         | 0                                         | 46,470 (38.1%)       | 46,470 (38.1%)          | 0                                         |
| <b>CADG 2</b>     | Number (%)   | 387,581 (69.7%)      | 387,581 (69.7%)         | 0                                         | 59,709 (49.0%)       | 59,709 (49.0%)          | 0                                         |
| <b>CADG 3</b>     | Number (%)   | 264,207 (47.5%)      | 264,207 (47.5%)         | 0                                         | 33,183 (27.2%)       | 33,183 (27.2%)          | 0                                         |
| <b>CADG 4</b>     | Number (%)   | 9,636 (1.7%)         | 9,636 (1.7%)            | 0                                         | 398 (0.3%)           | 398 (0.3%)              | 0                                         |
| <b>CADG 5</b>     | Number (%)   | 162,609 (29.2%)      | 162,609 (29.2%)         | 0                                         | 40,814 (33.5%)       | 40,814 (33.5%)          | 0                                         |
| <b>CADG 6</b>     | Number (%)   | 262,161 (47.1%)      | 262,161 (47.1%)         | 0                                         | 37,822 (31.0%)       | 37,822 (31.0%)          | 0                                         |
| <b>CADG 7</b>     | Number (%)   | 20,560 (3.7%)        | 20,560 (3.7%)           | 0                                         | 854 (0.7%)           | 854 (0.7%)              | 0                                         |
| <b>CADG 8</b>     | Number (%)   | 84,432 (15.2%)       | 84,432 (15.2%)          | 0                                         | 7,781 (6.4%)         | 7,781 (6.4%)            | 0                                         |
| <b>CADG 9</b>     | Number (%)   | 24,693 (4.4%)        | 24,693 (4.4%)           | 0                                         | 1,660 (1.4%)         | 1,660 (1.4%)            | 0                                         |
| <b>CADG 10</b>    | Number (%)   | 53,887 (9.7%)        | 53,887 (9.7%)           | 0                                         | 12,627 (10.4%)       | 12,627 (10.4%)          | 0                                         |
| <b>CADG 11</b>    | Number (%)   | 318,355 (57.2%)      | 318,355 (57.2%)         | 0                                         | 36,181 (29.7%)       | 36,181 (29.7%)          | 0                                         |
| <b>CADG 12</b>    | Number (%)   | 5,843 (1.1%)         | 5,843 (1.1%)            | 0                                         | 31 (0.0%)            | 31 (0.0%)               | 0                                         |

**Legend:** SD – standard deviation; IQR – interquartile range; CADG – Collapsed Adjusted Diagnosis Groups

**Note:** The cohort was matched on age+/-2 years, sex (hard match, not shown) and CADG from the Johns Hopkins Adjusted Clinical Groups (ACG) software.

**Source:** Data housed at Institute for Clinical Evaluative Sciences.

#### IV. Ontario patient-level costs

**Supplementary Table S5 – Total gross cost, and 95% confidence intervals (CI), by cost component for patients with malignant neoplasms diagnosed in the past 10 years in Ontario, 2005–2008 (constant 2015 \$000,000)**

| COST COMPONENT:                     | 2005             |                  |                  | 2006             |                  |                  | 2007             |                  |                  | 2008             |                  |                  |
|-------------------------------------|------------------|------------------|------------------|------------------|------------------|------------------|------------------|------------------|------------------|------------------|------------------|------------------|
|                                     | Gross Cost       | Lower 95% CI     | Upper 95% CI     | Gross Cost       | Lower 95% CI     | Upper 95% CI     | Gross Cost       | Lower 95% CI     | Upper 95% CI     | Gross Cost       | Lower 95% CI     | Upper 95% CI     |
| <b>Hospital Care</b>                |                  |                  |                  |                  |                  |                  |                  |                  |                  |                  |                  |                  |
| Acute inpatient hospital care       | \$1,116.6        | \$1,104.2        | \$1,129.0        | \$1,248.7        | \$1,234.8        | \$1,262.6        | \$1,408.9        | \$1,391.0        | \$1,426.7        | \$1,471.4        | \$1,453.9        | \$1,489.0        |
| Ambulatory hospital care            |                  |                  |                  |                  |                  |                  |                  |                  |                  |                  |                  |                  |
| Day surgery                         | \$89.0           | \$88.2           | \$89.9           | \$96.4           | \$95.5           | \$97.3           | \$109.0          | \$108.0          | \$110.1          | \$117.5          | \$116.4          | \$118.5          |
| Emergency department visits         | \$73.0           | \$72.4           | \$73.6           | \$76.8           | \$76.1           | \$77.4           | \$83.0           | \$82.3           | \$83.7           | \$89.1           | \$88.4           | \$89.8           |
| Cancer clinics                      | n/a              | n/a              | n/a              | \$360.2          | \$355.9          | \$364.5          | \$521.3          | \$515.9          | \$526.7          | \$501.2          | \$495.8          | \$506.7          |
| Dialysis clinics                    | n/a              | n/a              | n/a              | \$38.4           | \$35.8           | \$41.1           | \$66.2           | \$61.8           | \$70.5           | \$87.7           | \$82.0           | \$93.4           |
| Psychiatric inpatient hospital care | \$18.1           | \$16.8           | \$19.4           | \$28.3           | \$25.7           | \$30.9           | \$37.2           | \$33.9           | \$40.5           | \$39.2           | \$35.5           | \$42.9           |
| Chronic and rehabilitation care     |                  |                  |                  |                  |                  |                  |                  |                  |                  |                  |                  |                  |
| Complex continuing care             | \$125.6          | \$119.5          | \$131.7          | \$123.3          | \$117.2          | \$129.4          | \$127.9          | \$121.6          | \$134.2          | \$132.2          | \$125.7          | \$138.7          |
| Long-term care                      | \$182.9          | \$178.3          | \$187.4          | \$189.6          | \$184.9          | \$194.3          | \$193.6          | \$188.8          | \$198.3          | \$198.9          | \$194.1          | \$203.8          |
| Rehabilitation                      | \$54.6           | \$51.6           | \$57.6           | \$62.1           | \$59.0           | \$65.3           | \$62.4           | \$59.1           | \$65.6           | \$68.6           | \$65.3           | \$71.9           |
| Other hospital care                 |                  |                  |                  |                  |                  |                  |                  |                  |                  |                  |                  |                  |
| Chemotherapy                        | \$92.3           | \$89.9           | \$94.6           | \$129.2          | \$125.7          | \$132.6          | \$150.6          | \$147.0          | \$154.1          | \$187.8          | \$183.9          | \$191.8          |
| Radiation therapy                   | \$82.7           | \$81.0           | \$84.4           | \$124.4          | \$122.2          | \$126.6          | \$174.3          | \$170.8          | \$177.9          | \$202.5          | \$198.5          | \$206.5          |
| <b>Physician Care</b>               |                  |                  |                  |                  |                  |                  |                  |                  |                  |                  |                  |                  |
| Fee-for-service                     | \$487.1          | \$483.9          | \$490.4          | \$538.4          | \$535.2          | \$541.5          | \$581.3          | \$577.2          | \$585.3          | \$629.4          | \$624.6          | \$634.1          |
| Non-fee-for-service                 | \$54.3           | \$53.5           | \$55.0           | \$69.4           | \$68.5           | \$70.3           | \$82.8           | \$81.8           | \$83.7           | \$101.8          | \$100.7          | \$102.9          |
| <b>Drugs*</b>                       | \$391.5          | \$388.0          | \$395.0          | \$424.3          | \$420.5          | \$428.2          | \$442.6          | \$438.9          | \$446.4          | \$474.5          | \$470.6          | \$478.3          |
| <b>Other Care</b>                   |                  |                  |                  |                  |                  |                  |                  |                  |                  |                  |                  |                  |
| Assistive devices                   | \$17.6           | \$16.9           | \$18.3           | \$17.4           | \$16.7           | \$18.0           | \$18.5           | \$17.9           | \$19.2           | \$19.6           | \$19.0           | \$20.2           |
| Home care                           | \$188.6          | \$185.8          | \$191.4          | \$241.7          | \$238.4          | \$245.0          | \$237.3          | \$234.4          | \$240.3          | \$260.0          | \$256.8          | \$263.1          |
| Diagnostic tests                    | \$35.6           | \$35.4           | \$35.8           | \$37.3           | \$37.1           | \$37.5           | \$39.8           | \$39.6           | \$40.0           | \$44.3           | \$44.1           | \$44.5           |
| Non-physician care**                | \$9.7            | \$9.5            | \$9.9            | \$10.5           | \$10.4           | \$10.7           | \$11.8           | \$11.6           | \$12.0           | \$13.7           | \$13.5           | \$13.9           |
| <b>Total Direct Cost</b>            | <b>\$3,019.3</b> | <b>\$2,999.1</b> | <b>\$3,039.5</b> | <b>\$3,816.2</b> | <b>\$3,792.0</b> | <b>\$3,840.5</b> | <b>\$4,348.4</b> | <b>\$4,319.6</b> | <b>\$4,377.2</b> | <b>\$4,639.4</b> | <b>\$4,609.4</b> | <b>\$4,669.4</b> |

**Note:** Data for assistive devices were missing from September 2010 onwards, data for cancer and dialysis clinics were missing for 2005, and data for psychiatric hospitalizations were missing from January 2005 to September 2005. Costs are presented for matched cancer patients (cases) only.

\* 'Drugs' includes outpatient prescription drugs covered by the provincial government payer.

\*\* 'Non-physician care' includes care provided by other professionals outside the hospital setting.

**Source:** Data housed at Institute for Clinical Evaluative Sciences.



**Supplementary Table S6 – Total gross cost, and 95% confidence intervals (CI), by cost component for patients with malignant neoplasms diagnosed in the past 10 years in Ontario, 2009–2012 (constant 2015 \$000,000)**

| COST COMPONENT:                     | 2009             |                  |                  | 2010             |                  |                  | 2011             |                  |                  | 2012             |                  |                  |
|-------------------------------------|------------------|------------------|------------------|------------------|------------------|------------------|------------------|------------------|------------------|------------------|------------------|------------------|
|                                     | Gross Cost       | Lower 95% CI     | Upper 95% CI     | Gross Cost       | Lower 95% CI     | Upper 95% CI     | Gross Cost       | Lower 95% CI     | Upper 95% CI     | Gross Cost       | Lower 95% CI     | Upper 95% CI     |
| <b>Hospital Care</b>                |                  |                  |                  |                  |                  |                  |                  |                  |                  |                  |                  |                  |
| Acute inpatient hospital care       | \$1,413.0        | \$1,395.2        | \$1,430.8        | \$1,412.6        | \$1,395.3        | \$1,429.9        | \$1,450.2        | \$1,432.5        | \$1,467.8        | \$1,564.0        | \$1,545.3        | \$1,582.6        |
| Ambulatory hospital care            |                  |                  |                  |                  |                  |                  |                  |                  |                  |                  |                  |                  |
| Day surgery                         | \$116.6          | \$115.5          | \$117.6          | \$120.6          | \$119.6          | \$121.7          | \$129.9          | \$128.8          | \$131.0          | \$144.4          | \$143.2          | \$145.6          |
| Emergency department visits         | \$84.7           | \$84.0           | \$85.4           | \$86.2           | \$85.5           | \$86.8           | \$94.4           | \$93.7           | \$95.1           | \$104.4          | \$103.6          | \$105.1          |
| Cancer clinics                      | \$477.1          | \$471.4          | \$482.7          | \$500.8          | \$494.8          | \$506.9          | \$758.0          | \$749.1          | \$766.8          | \$788.4          | \$779.7          | \$797.1          |
| Dialysis clinics                    | \$82.4           | \$76.9           | \$87.9           | \$89.0           | \$83.1           | \$94.9           | \$62.9           | \$58.9           | \$67.0           | \$72.5           | \$68.0           | \$77.0           |
| Psychiatric inpatient hospital care | \$38.9           | \$35.4           | \$42.5           | \$41.3           | \$37.6           | \$44.9           | \$43.1           | \$39.2           | \$47.0           | \$48.9           | \$44.9           | \$52.9           |
| Chronic and rehabilitation care     |                  |                  |                  |                  |                  |                  |                  |                  |                  |                  |                  |                  |
| Complex continuing care             | \$127.3          | \$121.0          | \$133.6          | \$135.7          | \$129.1          | \$142.3          | \$136.4          | \$129.9          | \$143.0          | \$145.2          | \$138.3          | \$152.0          |
| Long-term care                      | \$183.6          | \$178.8          | \$188.3          | \$208.6          | \$203.3          | \$213.9          | \$215.1          | \$209.5          | \$220.6          | \$223.3          | \$217.6          | \$228.9          |
| Rehabilitation                      | \$63.7           | \$60.6           | \$66.9           | \$67.7           | \$64.3           | \$71.1           | \$73.8           | \$70.4           | \$77.2           | \$82.8           | \$79.0           | \$86.6           |
| Other hospital care                 |                  |                  |                  |                  |                  |                  |                  |                  |                  |                  |                  |                  |
| Chemotherapy                        | \$172.6          | \$168.8          | \$176.4          | \$187.3          | \$183.2          | \$191.3          | \$195.3          | \$191.0          | \$199.5          | \$213.6          | \$209.0          | \$218.1          |
| Radiation therapy                   | \$186.0          | \$182.2          | \$189.8          | \$202.6          | \$198.6          | \$206.5          | \$235.7          | \$231.5          | \$240.0          | \$242.6          | \$238.1          | \$247.0          |
| <b>Physician Care</b>               |                  |                  |                  |                  |                  |                  |                  |                  |                  |                  |                  |                  |
| Fee-for-service                     | \$595.3          | \$591.8          | \$598.9          | \$639.8          | \$636.7          | \$642.9          | \$694.8          | \$691.6          | \$698.1          | \$725.7          | \$722.4          | \$728.9          |
| Non-fee-for-service                 | \$112.8          | \$109.2          | \$116.3          | \$111.3          | \$110.4          | \$112.2          | \$102.5          | \$101.9          | \$103.1          | \$122.3          | \$121.6          | \$123.0          |
| <b>Drugs*</b>                       | \$474.2          | \$470.0          | \$478.4          | \$478.2          | \$473.0          | \$483.3          | \$485.4          | \$479.8          | \$490.9          | \$516.8          | \$510.8          | \$522.9          |
| <b>Other Care</b>                   |                  |                  |                  |                  |                  |                  |                  |                  |                  |                  |                  |                  |
| Assistive devices                   | \$18.6           | \$18.1           | \$19.2           | \$4.1            | \$3.8            | \$4.3            | n/a              | n/a              | n/a              | n/a              | n/a              | n/a              |
| Home care                           | \$257.3          | \$254.0          | \$260.7          | \$264.6          | \$261.2          | \$268.0          | \$289.1          | \$285.4          | \$292.7          | \$301.3          | \$297.6          | \$305.0          |
| Diagnostic tests                    | \$46.1           | \$45.9           | \$46.3           | \$46.2           | \$46.0           | \$46.4           | \$46.2           | \$46.0           | \$46.4           | \$47.5           | \$47.3           | \$47.7           |
| Non-physician care**                | \$15.1           | \$14.9           | \$15.4           | \$17.2           | \$16.9           | \$17.4           | \$19.0           | \$18.7           | \$19.2           | \$20.7           | \$20.5           | \$21.0           |
| <b>Total Direct Cost</b>            | <b>\$4,465.5</b> | <b>\$4,435.7</b> | <b>\$4,495.3</b> | <b>\$4,613.5</b> | <b>\$4,583.3</b> | <b>\$4,643.7</b> | <b>\$5,031.7</b> | <b>\$4,999.8</b> | <b>\$5,063.6</b> | <b>\$5,364.2</b> | <b>\$5,330.7</b> | <b>\$5,397.6</b> |

**Note:** Data for assistive devices were missing from September 2010 onwards, data for cancer and dialysis clinics were missing for 2005, and data for psychiatric hospitalizations were missing from January 2005 to September 2005. Costs are presented for matched cancer patients (cases) only.

\* 'Drugs' includes outpatient prescription drugs covered by the provincial government payer.

\*\* 'Non-physician care' includes care provided by other professionals outside the hospital setting.

**Source:** Data housed at Institute for Clinical Evaluative Sciences.

## V. Costs in Canada

**Supplementary Table S7 – Total (net) public expenditures on cancer care by provincial/territorial governments in Canada, by cost component, sex and year (constant 2015 \$000,000)**

|                   | 2005      | 2006      | 2007      | 2008      | 2009      | 2010      | 2011      | 2012      |
|-------------------|-----------|-----------|-----------|-----------|-----------|-----------|-----------|-----------|
| <b>Both Sexes</b> |           |           |           |           |           |           |           |           |
| Hospital Care     | \$1,645.7 | \$1,828.7 | \$2,463.1 | \$2,600.1 | \$2,600.6 | \$2,748.8 | \$3,669.2 | \$4,399.2 |
| Chemotherapy      | \$186.7   | \$286.9   | \$412.0   | \$484.4   | \$495.9   | \$563.8   | \$670.9   | \$708.2   |
| Radiation Therapy | \$208.8   | \$301.7   | \$360.0   | \$450.3   | \$476.9   | \$533.9   | \$563.2   | \$627.2   |
| Physician Care    | \$496.4   | \$549.5   | \$608.3   | \$697.4   | \$717.6   | \$750.3   | \$782.3   | \$888.4   |
| Drugs             | \$209.9   | \$230.4   | \$255.5   | \$295.0   | \$298.0   | \$331.7   | \$368.8   | \$449.9   |
| Other Care        | \$199.5   | \$387.0   | \$368.0   | \$410.9   | \$347.6   | \$323.4   | \$333.5   | \$398.9   |
| Total             | \$2,947.0 | \$3,584.4 | \$4,466.8 | \$4,938.1 | \$4,936.6 | \$5,252.0 | \$6,387.9 | \$7,472.0 |
| <b>Female</b>     |           |           |           |           |           |           |           |           |
| Hospital Care     | \$778.1   | \$861.2   | \$1,198.1 | \$1,308.3 | \$1,239.3 | \$1,300.8 | \$1,743.1 | \$2,027.3 |
| Chemotherapy      | \$87.8    | \$135.6   | \$196.1   | \$218.5   | \$204.1   | \$226.5   | \$324.9   | \$389.4   |
| Radiation Therapy | \$119.2   | \$207.8   | \$243.4   | \$281.1   | \$286.9   | \$314.9   | \$316.9   | \$333.8   |
| Physician Care    | \$245.2   | \$276.0   | \$302.5   | \$347.3   | \$351.6   | \$369.4   | \$382.0   | \$426.8   |
| Drugs             | \$70.8    | \$86.9    | \$102.3   | \$124.1   | \$125.8   | \$135.2   | \$151.3   | \$183.4   |
| Other Care*       | \$117.1   | \$224.1   | \$222.7   | \$244.3   | \$194.3   | \$176.7   | \$179.9   | \$210.1   |
| Total             | \$1,418.2 | \$1,791.6 | \$2,265.1 | \$2,523.5 | \$2,402.1 | \$2,523.4 | \$3,098.1 | \$3,570.7 |
| <b>Male</b>       |           |           |           |           |           |           |           |           |
| Hospital Care     | \$867.5   | \$967.6   | \$1,265.0 | \$1,291.8 | \$1,361.3 | \$1,448.1 | \$1,926.1 | \$2,372.0 |
| Chemotherapy      | \$98.9    | \$151.3   | \$215.9   | \$265.9   | \$291.8   | \$337.4   | \$346.0   | \$318.9   |
| Radiation Therapy | \$89.6    | \$93.9    | \$116.5   | \$169.2   | \$190.0   | \$219.0   | \$246.4   | \$293.4   |
| Physician Care    | \$251.1   | \$273.5   | \$305.8   | \$350.1   | \$366.0   | \$380.8   | \$400.3   | \$461.6   |
| Drugs             | \$139.1   | \$143.6   | \$153.2   | \$170.9   | \$172.2   | \$196.5   | \$217.5   | \$266.6   |
| Other Care*       | \$82.4    | \$162.9   | \$145.3   | \$166.6   | \$153.3   | \$146.8   | \$153.6   | \$188.8   |
| Total             | \$1,528.8 | \$1,792.8 | \$2,201.7 | \$2,414.6 | \$2,534.6 | \$2,728.5 | \$3,289.8 | \$3,901.3 |

\*'Other Care' includes home care, non-physician care (including other professional services), diagnostic testing, and assistive devices.

**Source:** Costs for Canada were estimated using a combination of purpose-derived estimates of mean net cost of cancer in Ontario, National Health Expenditures (NHEX) data on relative expenditures by cost category for each province versus Ontario (Table E),<sup>5</sup> and prevalence figures for each province/territory, which we estimated based on data from the Canadian Cancer Society (CCS) and Statistics Canada<sup>1-3</sup> and NHEX data on population by age, sex and province/territory for 2005–2012.<sup>5</sup>

## References

1. Canadian Cancer Society's Steering Committee on Cancer Statistics. 2009. Canadian Cancer Statistics 2009. Toronto, ON: Canadian Cancer Society; 2009. Available online: <http://www.cancer.ca/en/cancer-information/cancer-101/canadian-cancer-statistics-publication/past-editions-canadian-cancer-statistics/?region=on> (Accessed: March 29, 2016).
2. Canadian Cancer Society's Steering Committee on Cancer Statistics. 2011. Canadian Cancer Statistics 2011. Toronto, ON: Canadian Cancer Society; 2011. Available online: <http://www.cancer.ca/en/cancer-information/cancer-101/canadian-cancer-statistics-publication/past-editions-canadian-cancer-statistics/?region=on> (Accessed: March 29, 2016).
3. Canadian Cancer Society's Advisory Committee on Cancer Statistics. 2014. Canadian Cancer Statistics 2014. Toronto, ON: Canadian Cancer Society; 2014. Available online: <http://www.cancer.ca/en/cancer-information/cancer-101/canadian-cancer-statistics-publication/past-editions-canadian-cancer-statistics/?region=on> (Accessed: March 29, 2016).
4. Mariotto AB, Rowland JH, Ries LAG, Scoppa S, Feuer EJ. Multiple Cancer Prevalence: A Growing Challenge in Long-term Survivorship. *Cancer Epidemiol Biomarkers Prev* 2007;16:566-571.
5. Canadian Institute for Health Information. 2016. National Health Expenditures Database (NHEX) Metadata. Available online: <https://www.cihi.ca/en/spending-and-health-workforce/spending/health-spending-data/national-health-expenditure-database> (Accessed: March 30, 2016).
